# Supplementary material for: Inflammatory Response in COVID-19 Depending on the Severity of the Disease and the Vaccination Status
Source: MDPI journal article supplement (doi:10.3390/ijms24108550), 2023-05-10
Supplement: s1 [file s1]

## Supplementary Materials

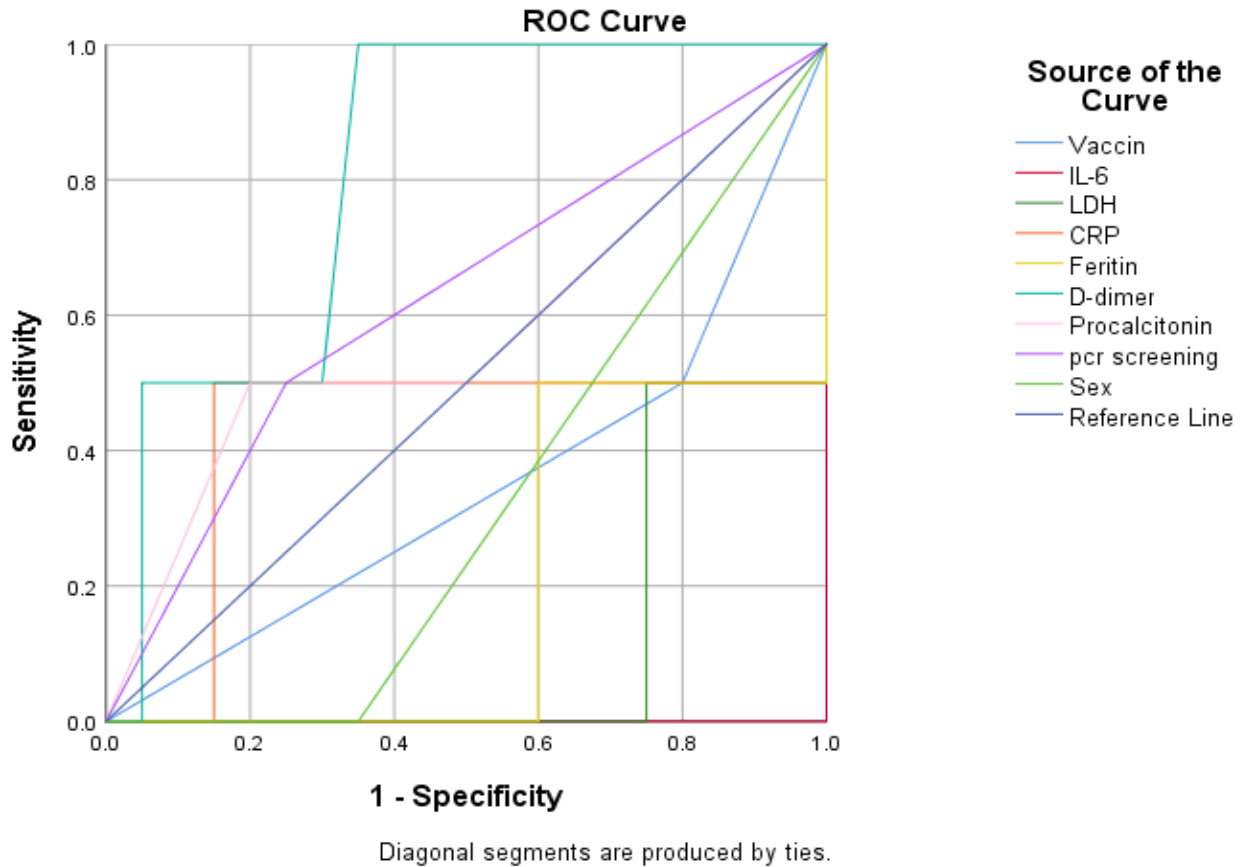

**Supplementary figure S1. ROC curves generated for biomarkers that best predicted the form of COVID-19:D-dimer.** D-dimer predicted the infection severity in our study group. For this analysis, the larger values of the test variables indicate stronger evidence of a positive actual state (severity of COVID-19), while the AUC values between 0.7-0.8 define a good capacity of discrimination.

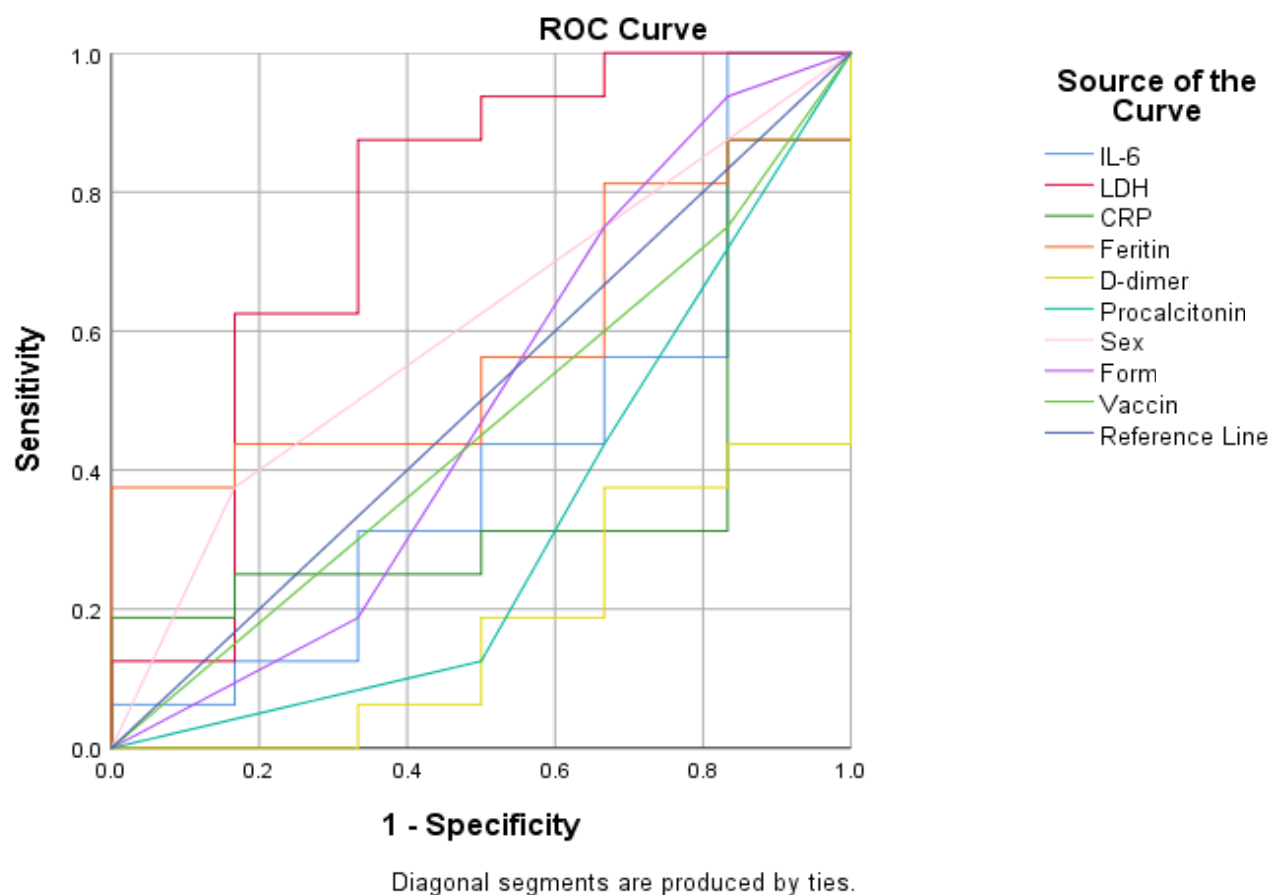

**Supplementary figure S2. ROC curves generated for biomarkers that best predicted the SARS-CoV-2 variant: LDH.** LDH predicted the virus variant in our study group. For this analysis, the larger values of the test variables indicate stronger evidence of a positive actual state (Omicron variant), while the AUC values between 0.7-0.8 define a good capacity of discrimination.
